# Supplementary material for: Differences in the Occurrence of Cell Wall Components between Distinct Cell Types in Glands of Drosophyllum lusitanicum
Source: MDPI journal article supplement (doi:10.3390/ijms242015045), 2023-10-10

**Figure S1**

**Figure S1.** Control reactions of cell wall components after immunolabeling. (**A,B**) Mucilage glands, bar 20  $\mu\text{m}$ .

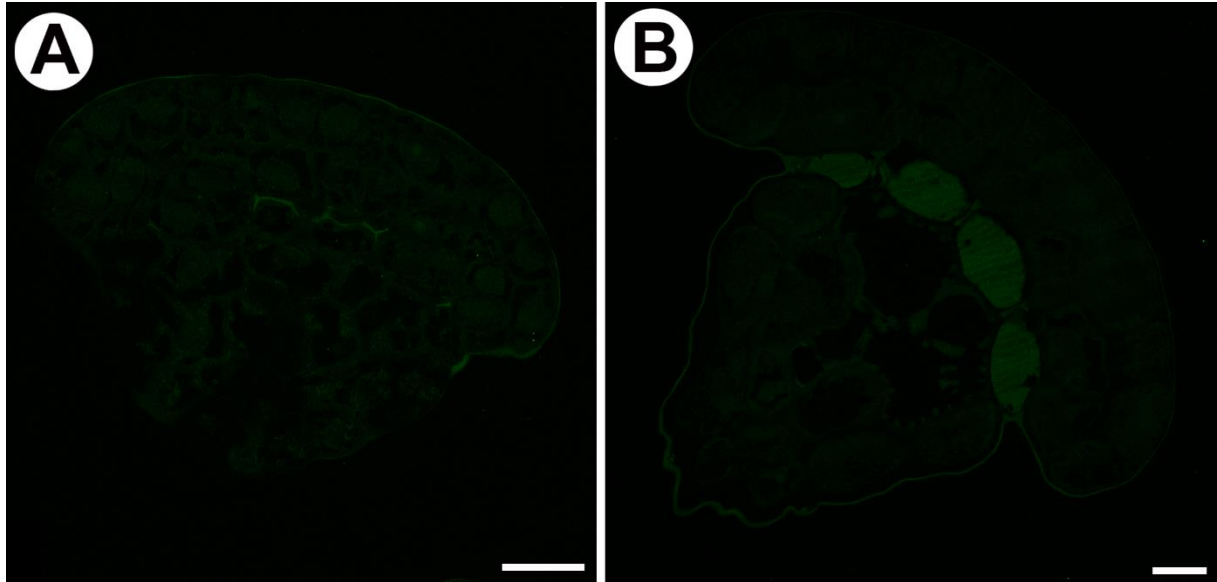

Supplement: s1 [file s1]
